# Supplementary material for: CHIP E3 ligase mediates proteasomal degradation of the proliferation regulatory protein ALDH1L1 during the transition of NIH3T3 fibroblasts from G0/G1 to S-phase
Source: PubMed Central journal article supplement (PMC6034817; doi:10.1371/journal.pone.0199699), 2018-07-06
Supplement: pone.0199699.s001.pdf [file pone.0199699.s001.pdf]

**S1 Table. List of primary antibodies used in this study for Western blot assays.**

| <b>Target</b>  | <b>Antibody</b>   | <b>Company</b> | <b>Cat # or reference*</b> | <b>Dilution</b> |
|----------------|-------------------|----------------|----------------------------|-----------------|
| AICART         | Rabbit polyclonal | In-house       | [5]                        | 1:10,000        |
| ALDH1L1        | Rabbit polyclonal | In-house       | [5,7,16,18]                | 1:10,000        |
| ALDH1L2        | Rabbit polyclonal | In-house       | [18]                       | 1:10,000        |
| $\beta$ -Actin | Mouse monoclonal  | Abcam          | ab8226                     | 1:10,000        |
| CBS            | Rabbit polyclonal | Abcam          | ab135626                   | 1:250           |
| CHIP           | Rabbit monoclonal | Abcam          | ab134064                   | 1:10,000        |
| DHFR           | Rabbit monoclonal | Abcam          | ab133546                   | 1:1,000         |
| GART           | Rabbit polyclonal | In-house       | [5]                        | 1:10,000        |
| GNMT           | Rabbit polyclonal | In-house       | [17]                       | 1:4,000         |
| HSP90          | Mouse monoclonal  | Abcam          | ab13492                    | 1:1,000         |
| MTHFD1         | Rabbit polyclonal | In-house       | [5]                        | 1:10,000        |
| MTHFR          | Rabbit monoclonal | Abcam          | ab203786                   | 1:1,000         |
| SHMT1          | Rabbit polyclonal | Cell Signaling | 12612                      | 1:1,000         |
| TYMS           | Rabbit monoclonal | Cell Signaling | 9045                       | 1:1,000         |
| Ubiquitin      | Rabbit monoclonal | Abcam          | ab140601                   | 1:2,500         |

\*For in-house antibodies, corresponding references are from the reference list in the main manuscript.
