# Supplementary material for: CHIP E3 ligase mediates proteasomal degradation of the proliferation regulatory protein ALDH1L1 during the transition of NIH3T3 fibroblasts from G0/G1 to S-phase
Source: PubMed Central journal article supplement (PMC6034817; doi:10.1371/journal.pone.0199699), 2018-07-06
Supplement: pone.0199699.s004.pdf [file pone.0199699.s004.pdf]

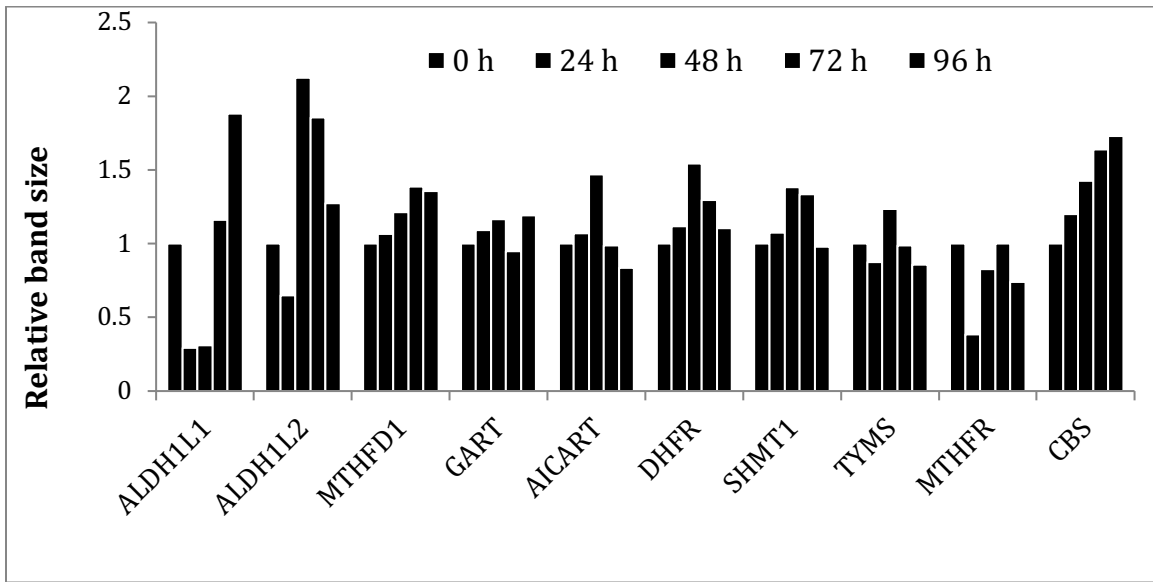

**S3 Fig. Plotted values from quantification of bands (normalized to actin) from S2 Fig (also Fig 9D in the main manuscript).** Samples for the assay were prepared from cells collected at indicated time points (hours) after splitting the culture.
